# Supplementary material for: Singlet oxygen photogeneration and 2,4,6-TCP photodegradation at Pt/TiO2 under visible light illumination
Source: Royal Society of Chemistry journal article supplement (doi:10.1039/c2ra21661b), 2012-01-01
Supplement: c2ra21661b.pdf [file c2ra21661b.pdf]

## Supporting Information

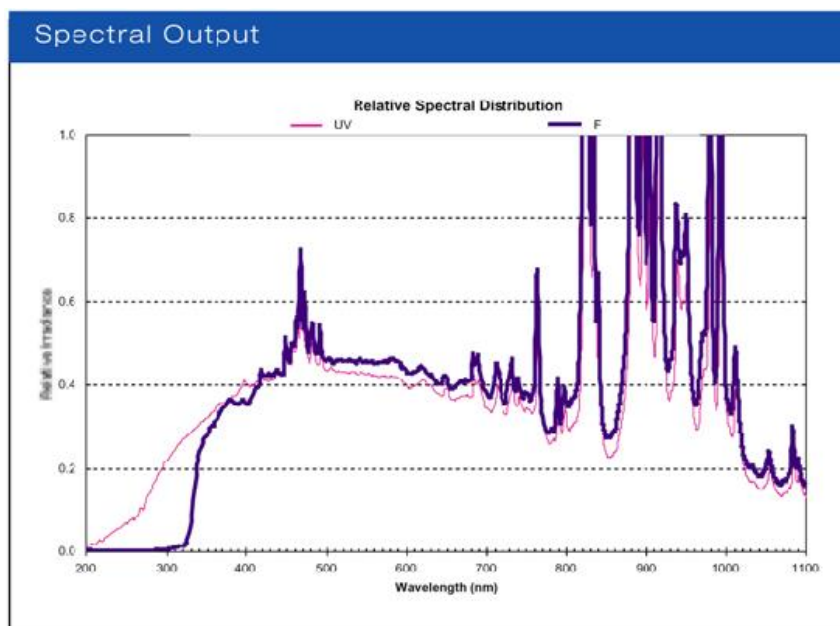

Figure S1. The original spectrum of the lamp (the pink line) get from Beijing Changtuo Lighting Corporation.

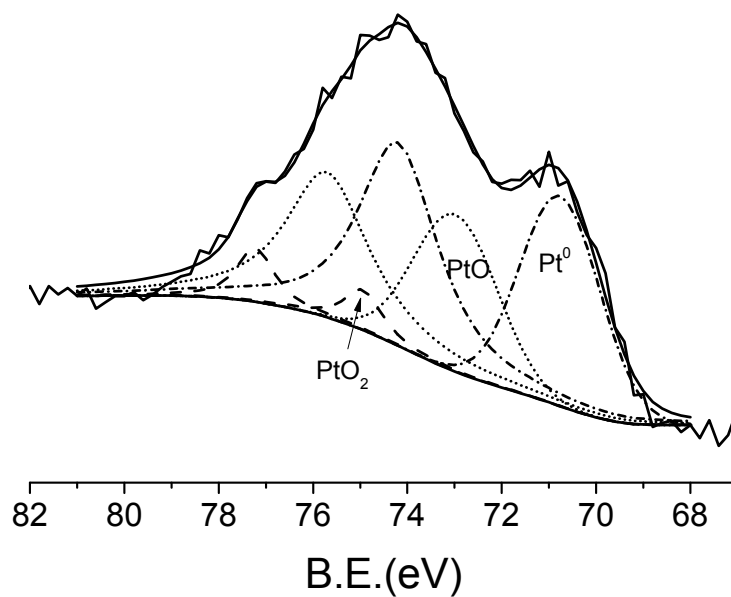

Figure S2. XPS spectra of pure TiO<sub>2</sub> and 0.18Pt-TiO<sub>2</sub>.

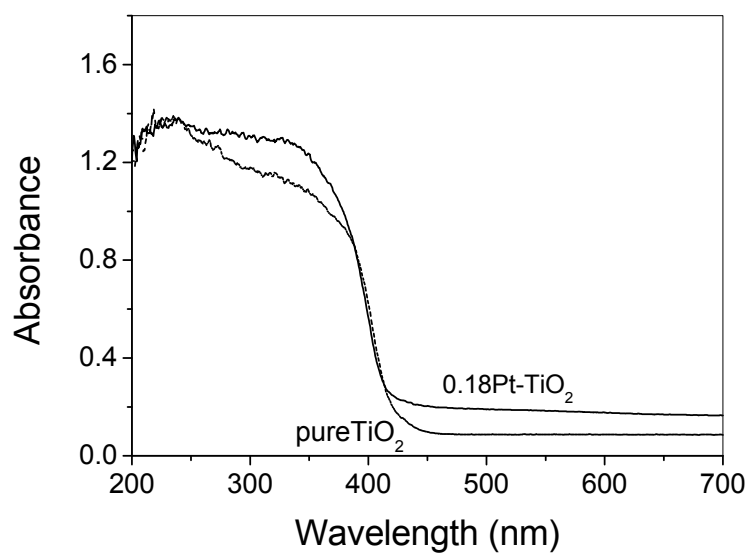

Figure S3. UV-VIS diffuse reflectance absorption spectra of pure TiO<sub>2</sub> and 0.18Pt-TiO<sub>2</sub>.

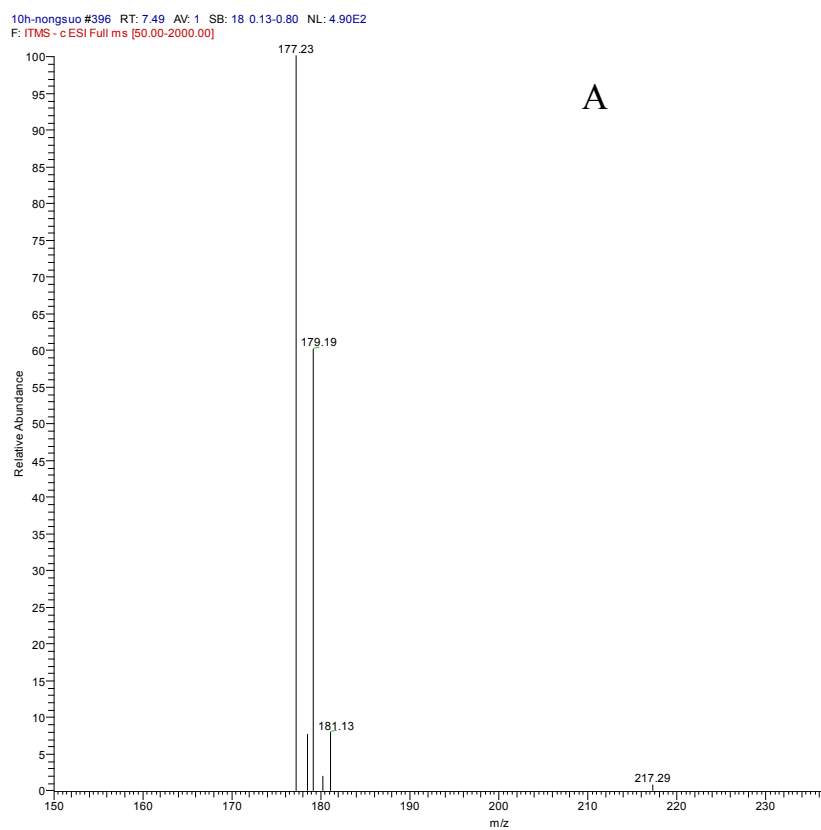

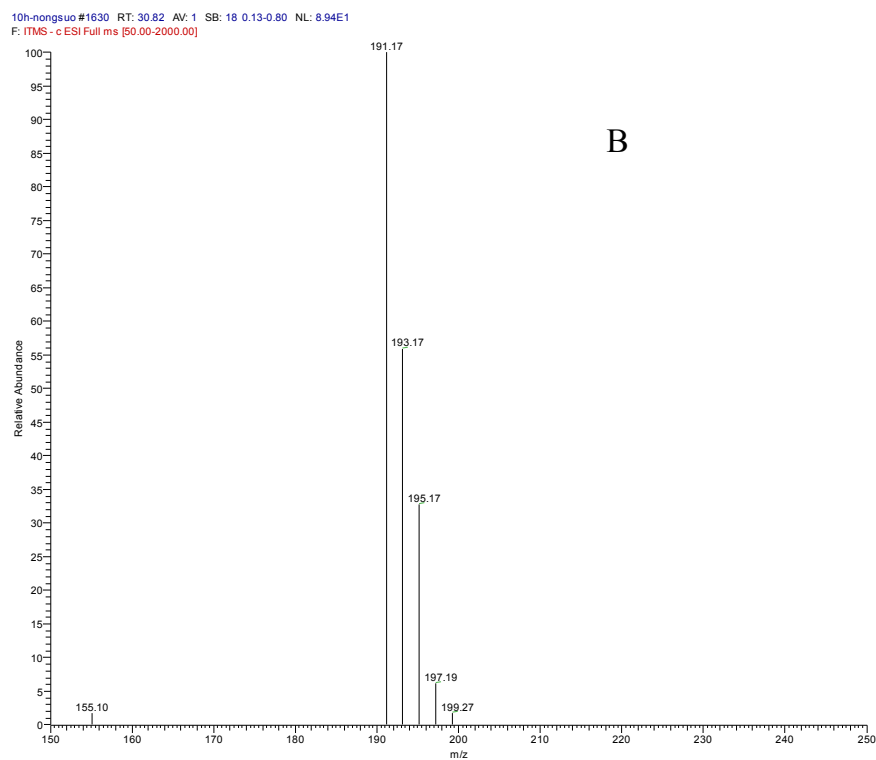

Figure S4. ESI spectra of A) 2,6-dichlorohydroquinone (DCHQ) and B) 2,6-dichloro-3-hydroxy-1,4-benzoquinone (DCHB).

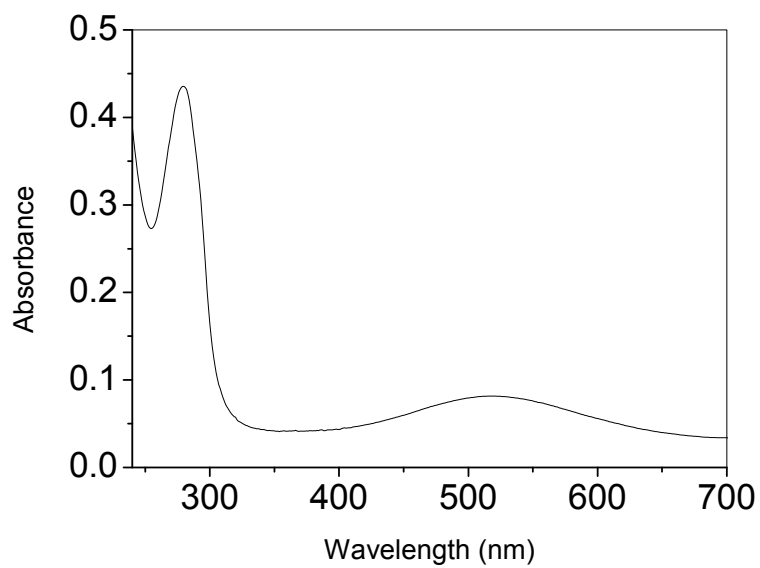

Figure S5. UV-VIS absorbance of TCP after 1 hour photoreaction in the presence of 0.18Pt-TiO<sub>2</sub>. The absorbance peak around 524 nm indicates the formation of 2,6-dichloro-3-hydroxy-1,4-benzoquinone (DCHB).

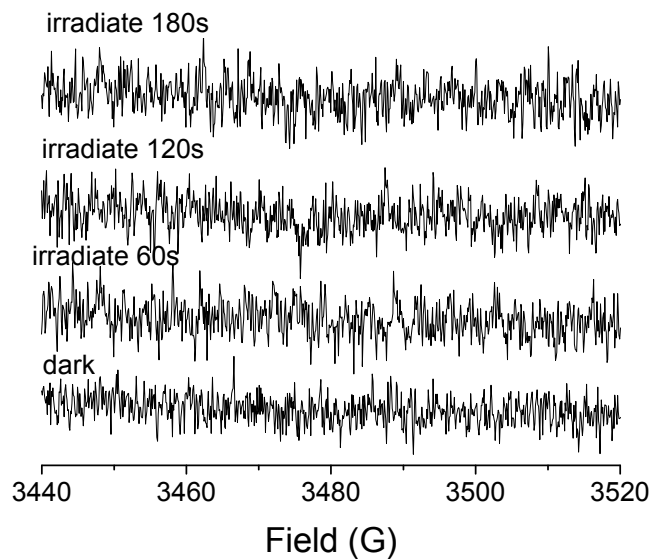

Figure S6. ESR determination of TEMP-<sup>1</sup>O<sub>2</sub> adducts in aqueous solution under 355 nm laser irradiation in the presence of 0.18Pt-TiO<sub>2</sub> and NaN<sub>3</sub>.
